# Supplementary material
Source: PubMed Central journal article supplement (PMC2536691)
Supplement: NIHMS60898-supplement-si20051030_113.pdf [file NIHMS60898-supplement-si20051030_113.pdf]

## Supporting Information

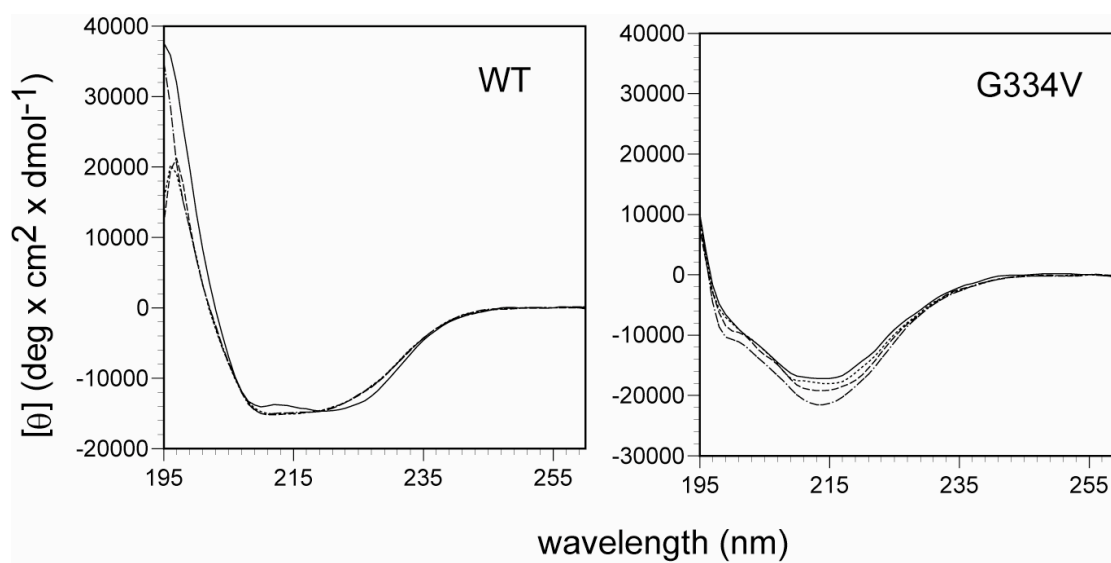

**Figure S1.** Time-dependent secondary structural transition of WT and G334V. CD spectra were measured in 50 mM sodium acetate buffer (pH 3.6), 100 mM NaCl with 10  $\mu$ M peptide. Samples were incubated for 1 min (line, —), 10 min (dots, .....), 30 min (dash, -----) or 2 hrs (dash and dots, -.-.-) at 37°C (*D*).

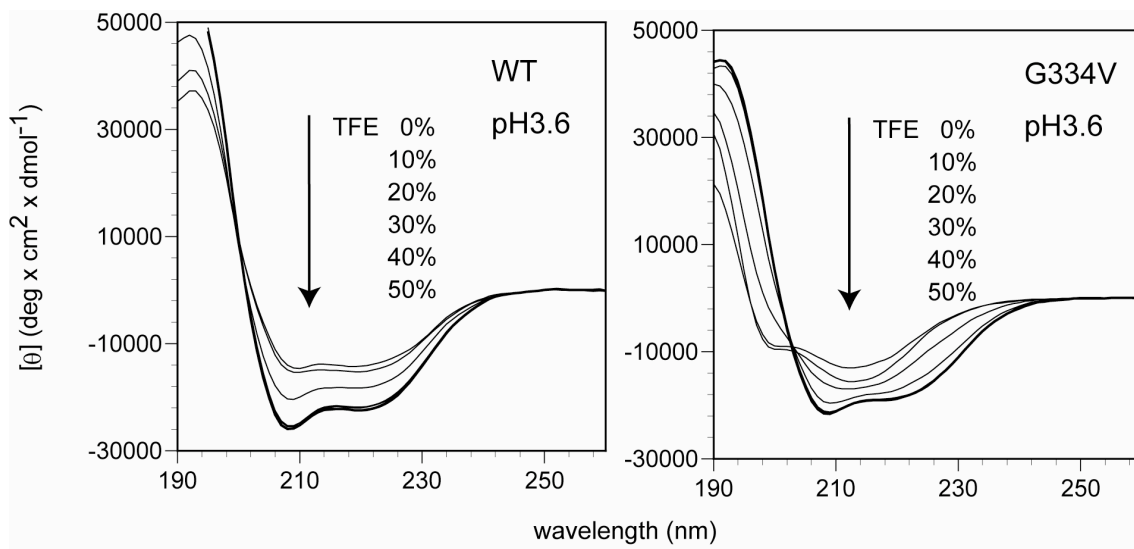

**Figure S2.** TFE-induced CD conformational change in the WT and G334V mutant peptides. All spectra were measured in 50 mM sodium acetate buffer, pH 3.6 in the presence of TFE (0-50 %) at 20°C with peptides at 10  $\mu\text{M}$ .

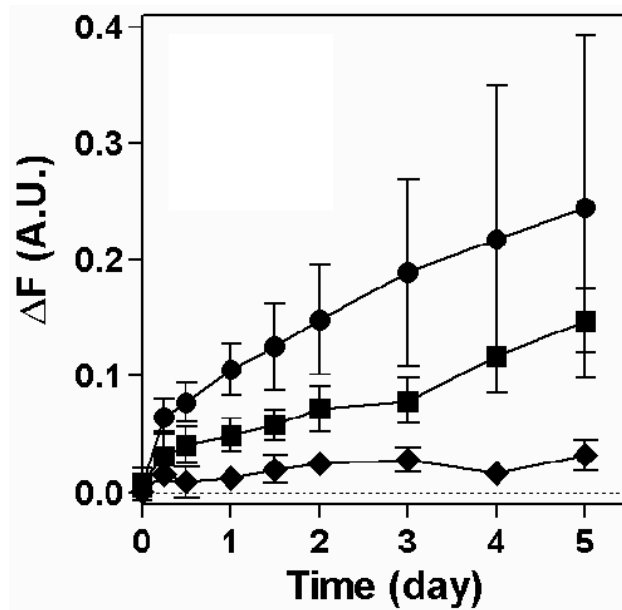

**Figure S3.** Rate of amyloid formation by the G334V peptide at different concentrations. The G334V peptide was prepared as described in Materials and Methods and incubated in sodium phosphate buffer, pH 7.5, at 37° C for the times indicated. Portions were then diluted into buffer containing 5 mM ThT, and the fluorescence intensity was measured as described except the amount of peptide solution diluted was adjusted so that the final peptide concentration was the same for all samples. Peptide concentrations were: 2 (diamonds), 10 (squares), or 50 (circles)  $\mu\text{M}$ . Data represent the mean  $\pm$ S.D. of seven experiments.
